# Supplementary material for: Hybrid Composite of Subnanometer CoPd Cluster-Decorated Cobalt Oxide-Supported Pd Nanoparticles Give Outstanding CO Production Yield in CO2 Reduction Reaction
Source: MDPI journal article supplement (doi:10.3390/catal12101127), 2022-09-27
Supplement: s1 [file s1]

Archive with 1 entries (1 files):
- catalysts-1930983-supplementary.pdf
